# Supplementary material
Source: Copernicus journal article supplement (doi:10.5194/egusphere-2026-1559)
Supplement: Supplementary file 1 [file egusphere-2026-1559-supplement.pdf]

## Supplementary Materials

### Supplementary Tables

Table S1. Sampling date, latitude and longitude of the cores taken by this study.

| Marsh            | Core ID | Sampling Date | Latitude  | Longitude |
|------------------|---------|---------------|-----------|-----------|
| Aldboro Point    | AP23/1  | 04/08/2023    | 51.834533 | 0.987312  |
|                  | AP23/2  |               | 51.833077 | 0.986191  |
|                  | AP23/3  |               | 51.834021 | 0.987137  |
|                  | AP23/4  |               | 51.833562 | 0.986089  |
|                  | AP23/5  |               | 51.833293 | 0.986758  |
|                  | AP23/6  |               | 51.832377 | 0.986017  |
|                  | AP23/7  |               | 51.831541 | 0.985929  |
|                  | AP23/8  |               | 51.830220 | 0.985362  |
| Freiston Shore   | FS23/1  | 15/06/2023    | 52.970278 | 0.095722  |
|                  | FS23/2  |               | 52.964833 | 0.095111  |
|                  | FS23/3  |               | 52.969361 | 0.096861  |
|                  | FS23/4  |               | 52.970361 | 0.094361  |
|                  | FS23/5  |               | 52.967194 | 0.092111  |
|                  | FS23/6  |               | 52.965056 | 0.093944  |
|                  | FS23/7  |               | 52.963917 | 0.090500  |
|                  | FS23/8  |               | 52.961944 | 0.090278  |
| Brancaster West  | BW23/1  | 03/08/2023    | 52.971754 | 0.633353  |
|                  | BW23/2  |               | 52.971694 | 0.630778  |
|                  | BW23/3  | 05/06/2023    | 52.972167 | 0.631694  |
|                  | BW23/4  |               | 52.971795 | 0.630168  |
|                  | BW23/5  |               | 52.972306 | 0.633139  |
|                  | BW23/6  |               | 52.971722 | 0.631611  |
|                  | BW23/7  |               | 52.971583 | 0.630083  |
|                  | BW23/8  |               | 52.972000 | 0.632889  |
| Fingringhoe Wick | FW23/1  | 20/06/2023    | 51.839889 | 0.977083  |
|                  | FW23/2  |               | 51.842139 | 0.972972  |
|                  | FW23/3  |               | 51.839056 | 0.976953  |
|                  | FW23/4  |               | 51.838556 | 0.976417  |
|                  | FW23/5  |               | 51.839472 | 0.973806  |
|                  | FW23/6  |               | 51.843167 | 0.972750  |
|                  | FW23/7  |               | 51.843833 | 0.972278  |
|                  | FW23/8  |               | 51.845389 | 0.973417  |

Table S2. Percentage cover of the plant species within the 1 m<sup>2</sup> areas surrounding our coring locations. AP - *Atriplex portulacoides*; AT - *Aster tripolium*; LV - *Limonium vulgare*; S - *Salicornia* spp.; SA - *Spartina anglica*; PM - *Puccinellia maritima*; TM - *Triglochin maritima*; BM – bare mud.

| Core ID | AP (%) | AT (%) | LV (%) | S (%) | SA (%) | PM (%) | TM (%) | BM (%) |
|---------|--------|--------|--------|-------|--------|--------|--------|--------|
| AP23/1  | 40     | 0      | 10     | 0     | 0      | 50     | 0      | 0      |
| AP23/2  | 0      | 0      | 0      | 0     | 30     | 70     | 0      | 0      |
| AP23/3  | 0      | 0      | 20     | 0     | 0      | 70     | 0      | 10     |
| AP23/4  | 98     | 0      | 0      | 0     | 0      | 2      | 0      | 0      |
| AP23/5  | 0      | 0      | 2      | 0     | 45     | 45     | 0      | 0      |
| AP23/6  | 90     | 0      | 0      | 0     | 0      | 10     | 0      | 0      |
| AP23/7  | 1      | 0      | 20     | 0     | 0      | 79     | 0      | 0      |
| AP23/8  | 0      | 0      | 5      | 0     | 5      | 80     | 0      | 10     |
| FS23/1  | 90     | 2      | 0      | 0     | 0      | 0      | 0      | 8      |
| FS23/2  | 90     | 0      | 1      | 0     | 5      | 0      | 0      | 4      |
| FS23/3  | 10     | 0      | 10     | 0     | 0      | 80     | 0      | 0      |
| FS23/4  | 80     | 0      | 0      | 0     | 5      | 0      | 0      | 15     |
| FS23/5  | 0      | 0      | 10     | 0     | 5      | 80     | 5      | 0      |
| FS23/6  | 90     | 0      | 5      | 0     | 0      | 0      | 0      | 5      |
| FS23/7  | 15     | 0      | 10     | 70    | 0      | 0      | 0      | 5      |
| FS23/8  | 10     | 0      | 0      | 0     | 60     | 10     | 0      | 20     |
| BW23/1  | 0      | 0      | 0      | 0     | 80     | 0      | 0      | 20     |
| BW23/2  | 0      | 0      | 0      | 0     | 80     | 0      | 0      | 20     |
| BW23/3  | 90     | 5      | 0      | 0     | 0      | 0      | 0      | 5      |
| BW23/4  | 90     | 0      | 5      | 0     | 0      | 0      | 0      | 5      |
| BW23/5  | 80     | 0      | 10     | 5     | 0      | 0      | 0      | 5      |
| BW23/6  | 0      | 0      | 5      | 0     | 40     | 0      | 0      | 55     |
| BW23/7  | 10     | 0      | 0      | 30    | 20     | 0      | 0      | 40     |
| BW23/8  | 10     | 0      | 25     | 0     | 20     | 15     | 10     | 20     |
| FW23/1  | 0      | 0      | 0      | 0     | 90     | 0      | 0      | 10     |
| FW23/2  | 0      | 0      | 0      | 0     | 70     | 0      | 0      | 30     |
| FW23/3  | 0      | 0      | 0      | 0     | 90     | 0      | 0      | 10     |
| FW23/4  | 0      | 0      | 0      | 40    | 40     | 0      | 0      | 20     |
| FW23/5  | 60     | 0      | 0      | 20    | 0      | 0      | 0      | 20     |
| FW23/6  | 0      | 0      | 0      | 30    | 0      | 0      | 0      | 70     |
| FW23/7  | 0      | 0      | 0      | 20    | 5      | 0      | 0      | 75     |
| FW23/8  | 0      | 0      | 0      | 0     | 25     | 0      | 0      | 75     |

Table S3. Summary of the variables identified that differ between restored and natural saltmarshes that could be useful as indicators of restoration.

| <b>Factor</b>            | <b>Natural marsh conditions</b>                                                                                                      | <b>Restored marsh conditions</b>                                                                                                                                                                      |
|--------------------------|--------------------------------------------------------------------------------------------------------------------------------------|-------------------------------------------------------------------------------------------------------------------------------------------------------------------------------------------------------|
| OC and N content         | Values are lowest at the bottom of the core and increase at higher depths, peaking at the surface – this is due to OM decomposition. | A peak in values is seen during or soon above the restoration horizon and after this OC and N content fall to levels like those seen pre-restoration.                                                 |
| Ratio of recalcitrant OM | Labile OM content increases up the cores because a high level initially enters the sediment, but this is quickly broken down.        | Soon after the restoration horizon, there is sometimes an influx of labile OM. The ratio remains very stable up the core, suggesting stabilisation happens through mineral association as in uplands. |
| Ratio of OC to N         | Average across all natural marsh samples is $14.30 \pm 1.75$ .                                                                       | Average across all restored marsh samples is $10.52 \pm 2.65$ .                                                                                                                                       |

## Supplementary Figures

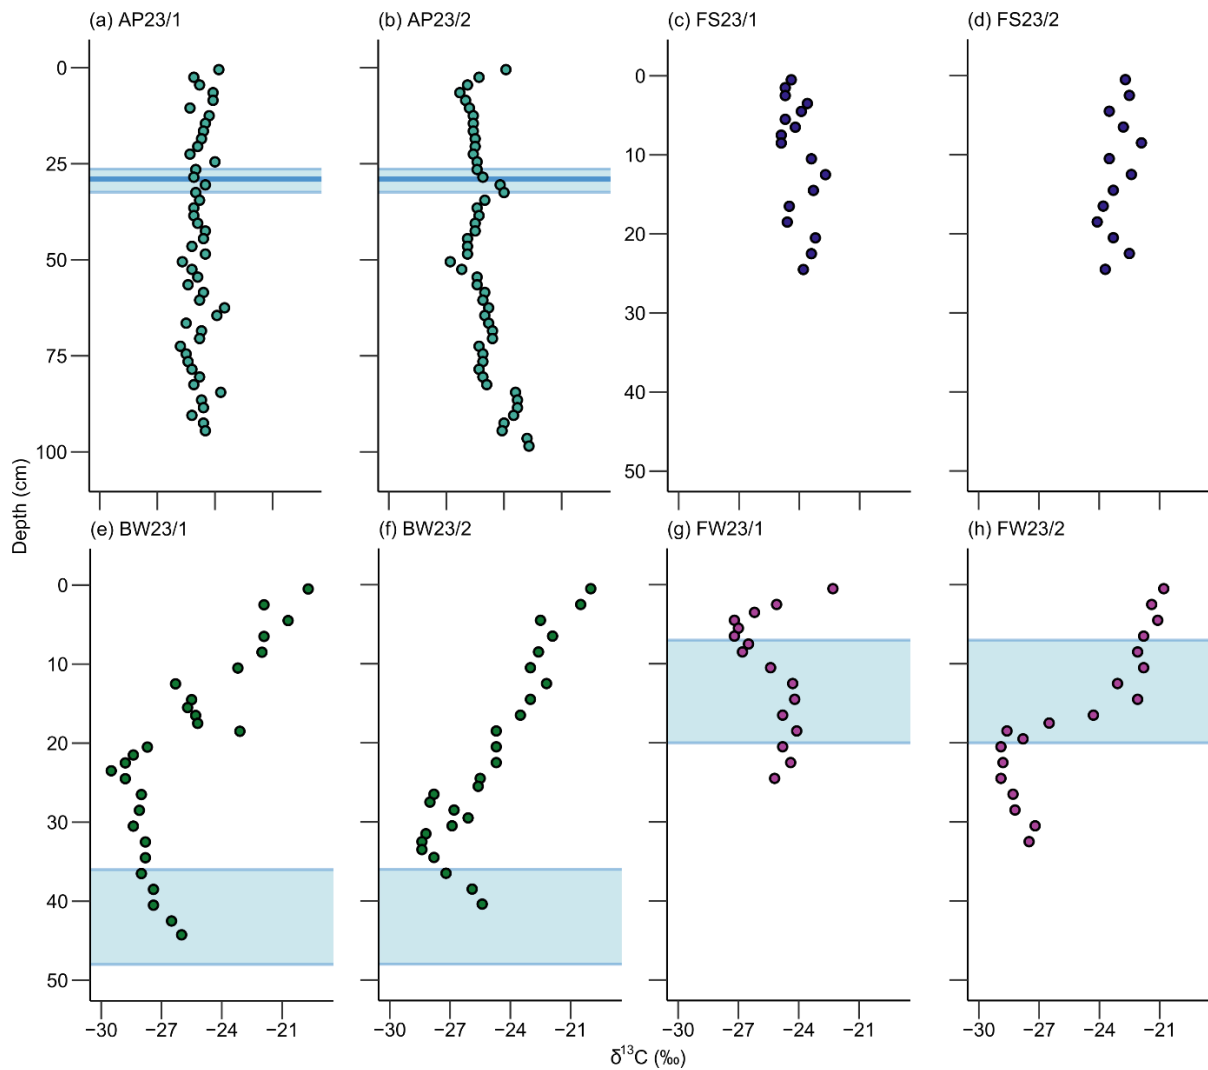

Figure S1.  $\delta^{13}\text{C}$  content of the wide diameter cores taken from (a & b) Aldboro Point, (c & d) Freiston Shore, (e & f) Brancaster West and (g & h) Fingringhoe Wick. The shaded blue areas denote the depth range at which the breaches may have occurred.

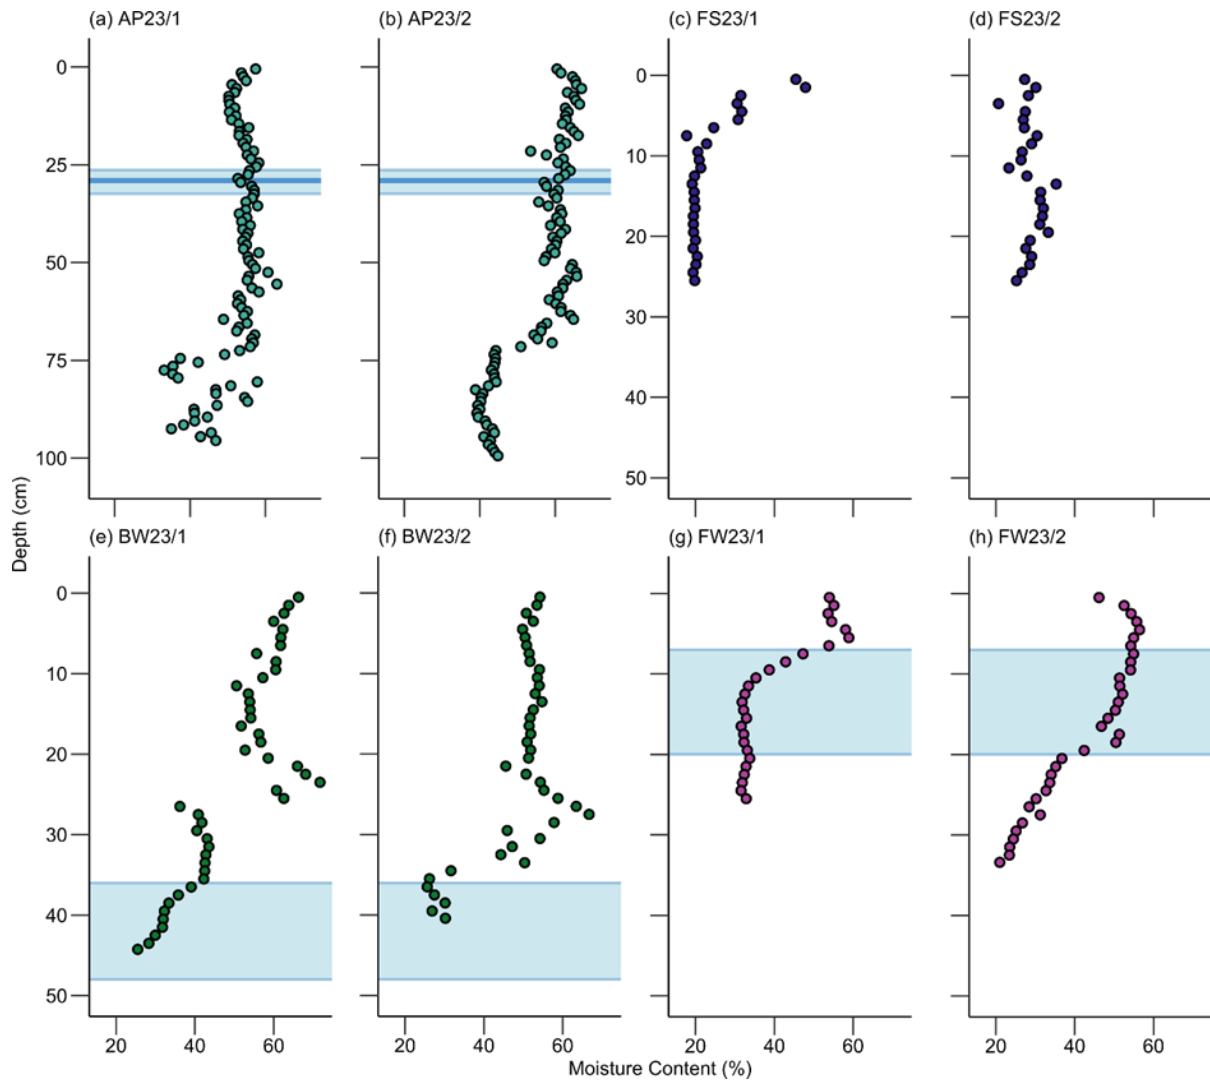

Figure S2. Moisture content of the wide diameter cores taken from (a & b) Aldboro Point, (c & d) Freiston Shore, (e & f) Brancaster West and (g & h) Fingringhoe Wick. The shaded blue areas denote the depth range at which the breaches may have occurred.

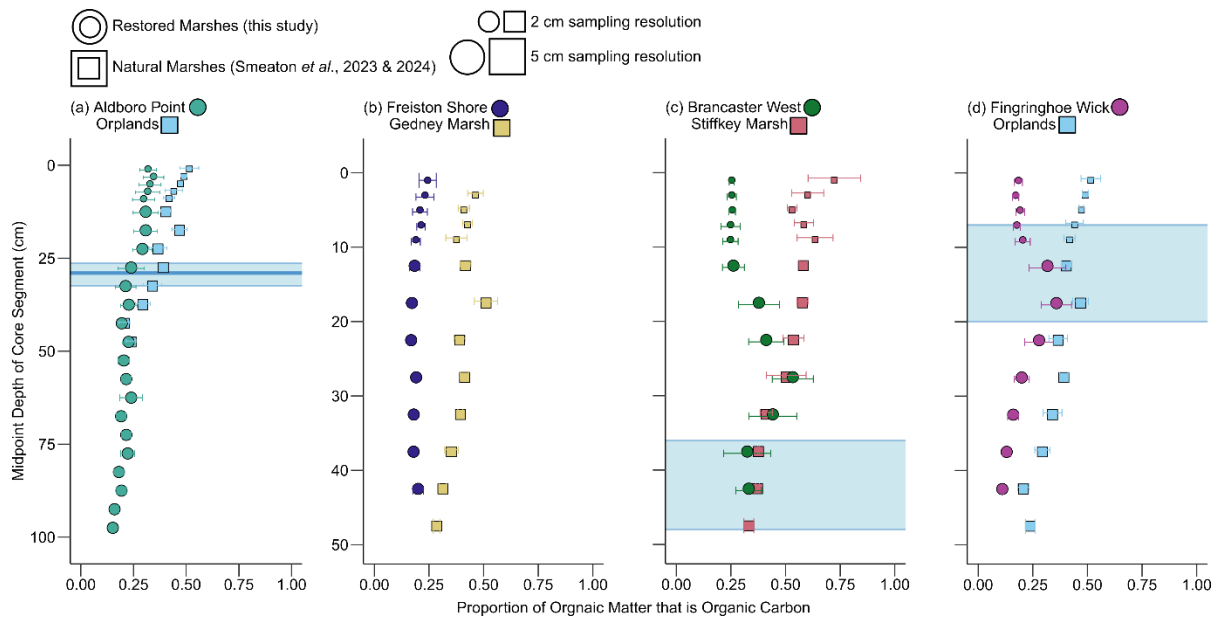

Figure S3. Proportion of total organic matter content that is organic carbon in the narrow cores taken from (a & b) Aldboro Point, (c & d) Freiston Shore, (e & f) Brancaster West and (g & h) Fingringhoe Wick. Restored marsh datapoints are always represented by circles while natural marsh data, collected by Smeaton *et al.* (2023; 2024) are represented by squares. Smaller symbols represent 2 cm samples while larger ones represent 5 cm samples. The shaded blue areas denote the depth range at which the breaches may have occurred and apply only to the restored saltmarshes, not the natural marshes.

## References

Smeaton, C. *et al.* (2023) 'Organic carbon stocks of Great British saltmarshes', *Frontiers in Marine Science*, 10. Available at:

<https://www.frontiersin.org/articles/10.3389/fmars.2023.1229486>.

Smeaton, C. *et al.* (2024) 'Organic carbon accumulation in British saltmarshes', *Science of The Total Environment*, p. 172104. Available at: <https://doi.org/10.1016/j.scitotenv.2024.172104>.
